# Supplementary material for: Distinct impact of antibiotics on the gut microbiome and resistome: a longitudinal multicenter cohort study
Source: PubMed Central journal article supplement (PMC6749691; doi:10.1186/s12915-019-0692-y), 2019-09-18
Supplement: 12915_2019_692_MOESM1_ESM.pdf [file 12915_2019_692_MOESM1_ESM.pdf]

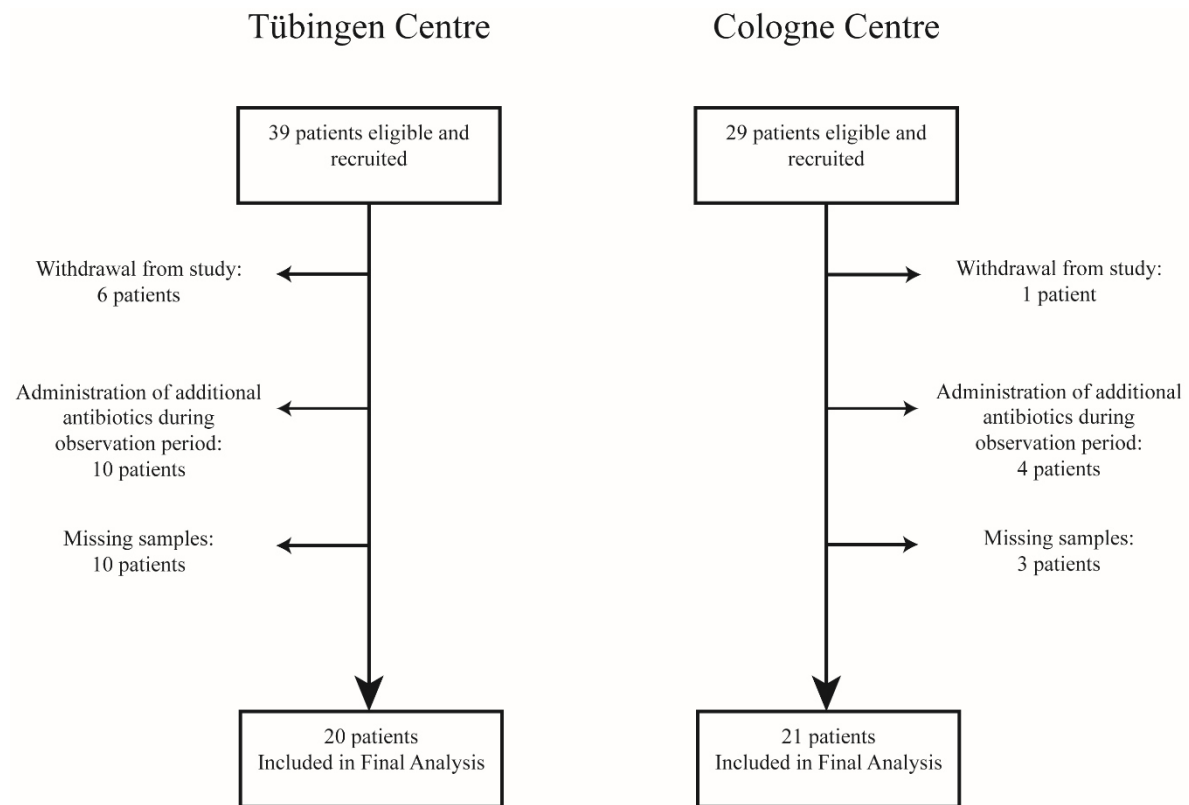

**Figure S1. Flowchart of study participant recruitment and exclusion reasons**
