# Supplementary material for: Distinct impact of antibiotics on the gut microbiome and resistome: a longitudinal multicenter cohort study
Source: PubMed Central journal article supplement (PMC6749691; doi:10.1186/s12915-019-0692-y), 2019-09-18
Supplement: 12915_2019_692_MOESM4_ESM.pdf [file 12915_2019_692_MOESM4_ESM.pdf]

**Table S3. Multivariate models of selection pressure estimates on the intestinal microbiome**

| Microbiome variable       | Drug model          | Model components                   | Coefficient (95% CI)                                             | p-value                  | LR p-value |
|---------------------------|---------------------|------------------------------------|------------------------------------------------------------------|--------------------------|------------|
| Phylum Shannon diversity  | Ciprofloxacin       | CiproDDD                           | -0.03 (-0.05 - -0.01)                                            | <0.001                   | 0.62       |
|                           |                     | AF                                 | 0.13 (0.04 - 0.22)                                               | 0.004                    |            |
|                           | Cotrimoxazole       | CotrimDDD<br>Creatinin<br>VirosDDD | -0.06 (-0.1 - -0.01)<br>0.2 (0.006 - 0.04)<br>0.11 (0.08 - 0.15) | 0.012<br>0.008<br><0.001 |            |
| Species Shannon diversity | Ciprofloxacin       | CiproDDD                           | -0.09 (-0.13 - -0.05)                                            | <0.001                   | 0.89       |
|                           | Cotrimoxazole       | CotrimDDD                          | -0.06 (-0.29 - 0.17)                                             | 0.62                     |            |
|                           |                     | Lymphoma                           | -0.76 (-0.92 - -0.6)                                             | <0.001                   |            |
|                           |                     | Creatinin                          | 0.1 (0.05 - 0.15)                                                | <0.001                   |            |
|                           |                     | VirosDDD                           | -0.38 (-0.51 - -0.25)                                            | <0.001                   |            |
| AFDDD                     | 0.04 (0.006 - 0.08) | 0.02                               |                                                                  |                          |            |
| Phylum evenness           | Ciprofloxacin       | CiproDDD                           | -0.00001 (-0.0002 - 0.0001)                                      | 0.86                     | 0.18       |
|                           |                     | VirosDDD                           | 0.004 (0.004 - 0.005)                                            | <0.001                   |            |
|                           | Cotrimoxazole       | CotrimDDD                          | -0.0007 (-0.001 - -0.0001)                                       | 0.014                    |            |
|                           |                     | Creatinin<br>VirosDDD              | 0.0002 (0.0001 - 0.0003)<br>0.002 (0.0014 - 0.0021)              | 0.001<br><0.0001         |            |
| Species evenness          | Ciprofloxacin       | CiproDDD                           | -0.00003 (-0.0001 - 0.00005)                                     | 0.51                     | 0.8        |
|                           | Cotrimoxazole       | CotrimDDD                          | 0.00005 (-0.0003 - 0.0004)                                       | 0.77                     |            |
|                           |                     | Lymphoma<br>Creatinin              | -0.0008 (-0.002 - -0.00005)<br>0.0001 (0.00009 - 0.0002)         | 0.04<br><0.001           |            |

95% CI, 95% confidence interval; LR, likelihood ratio test for coefficient differences; CiproDDD, cumulative dose of ciprofloxacin in defined daily doses (DDD); CotrimDDD, cumulative dose of cotrimoxazole in defined daily doses (DDD); VirosDDD, cumulative dose of antiviral agents in defined daily doses (DDD); Lymphoma, lymphoma as underlying disease; AF, at least one administration of antifungals during the observation period, AFDDD, cumulative dose of antifungals in defined daily doses (DDD).

The coefficients denote the increase (positive coefficient) or decrease (negative coefficient) of the respective diversity/evenness per unit of the model component. For instance, a coefficient of -0.06 for CotrimDDD within phylum diversity means a decrease of 0.06 units Shannon diversity per cumulative DDD increase of cotrimoxazole. The p-value denotes the statistical significance of the coefficient. Contributing factors are displayed when statistically significant in the multivariate model ( $p \leq 0.05$ ). The LR p-value indicates differences between the antibiotics' coefficients. A Bonferroni corrected LR p-value  $< 0.002$  was regarded a significant difference in the impact of both antibiotics on a specific microbiome variable. The multivariate coefficient can be identical with the univariate coefficient for antibiotics when no confounding was noted.
