# Supplementary material for: Distinct impact of antibiotics on the gut microbiome and resistome: a longitudinal multicenter cohort study
Source: PubMed Central journal article supplement (PMC6749691; doi:10.1186/s12915-019-0692-y), 2019-09-18
Supplement: 12915_2019_692_MOESM13_ESM.pdf [file 12915_2019_692_MOESM13_ESM.pdf]

**Table S5. Multivariate models of selection pressure estimates on antibiotic resistance genes**

| ARG class | Drug model    | Model components | Coefficient (95% CI)       | p-value | LR p-value |
|-----------|---------------|------------------|----------------------------|---------|------------|
| AGly      | Ciprofloxacin | CiproDDD         | -0.4 (-1 - 0.2)            | 0.19    | <0.0001    |
|           | Cotrimoxazole | CotrimDDD        | 1.45 (-2.35 - 5.25)        | 0.45    |            |
|           |               | VirosDDD         | 6.41 (4.37 - 8.45)         | <0.001  |            |
| Bla       | Ciprofloxacin | CiproDDD         | 0.73 (-1.75 - 3.22)        | 0.56    | 0.04       |
|           |               | Leucaemia        | 60.55 (25.4 - 95.71)       | 0.001   |            |
|           | Cotrimoxazole | CotrimDDD        | -7.44 (-20.48 - 5.59)      | 0.25    |            |
| CTX-M     | Ciprofloxacin | CiproDDD         | 6.33 (1.04 - 11.61)        | 0.02    | <0.0001    |
|           |               | CotrimDDD        | -0.02 (-0.06 - 0.02)       | 0.25    |            |
|           | Cotrimoxazol  | CotrimDDD        | -0.02 (-0.06 - 0.02)       | 0.25    |            |
| Flq       | Ciprofloxacin | CiproDDD         | 0.05 (-0.01 - 0.12)        | 0.13    | 0.79       |
|           |               | CotrimDDD        | -0.001 (-0.35 - 0.35)      | 0.99    |            |
|           | Cotrimoxazole | CotrimDDD        | 0.15 (-0.74 - 1.05)        | 0.74    |            |
| Gly       | Ciprofloxacin | CiproDDD         | 2.43 (2.26 - 2.6)          | <0.001  | < 0.0001   |
|           |               | Viros            | 0.04 (-0.21 - 0.29)        | 0.79    |            |
|           |               | CotrimDDD        | 3.27 (0.06 - 6.48)         | 0.05    |            |
| MLS       | Cotrimoxazole | CotrimDDD        | -0.11 (-0.67 - 0.44)       | 0.68    | <0.0001    |
|           | Ciprofloxacin | CiproDDD         | 4.22 (-5.91 - 14.35)       | 0.39    |            |
|           |               | Viros            | -77.07 (-101.54 - -52.58)  | <0.001  |            |
| Ntmdz     | Cotrimoxazole | CotrimDDD        | 7.76 (-6.9 - 22.52)        | 0.3     | <0.0001    |
|           |               | Lymphoma         | 59.98 (27.59 - 92.38)      | <0.001  |            |
|           | Ciprofloxacin | CiproDDD         | -0.0008 (-0.002 - 0.00004) | 0.06    |            |
| Phe       | Cotrimoxazol  | CotrimDDD        | -0.006 (-0.018 - 0.017)    | 0.94    | <0.0001    |
|           |               | Creatinin        | -0.003 (-0.005 - -0.0007)  | 0.01    |            |
|           |               | VirosDDD         | -0.009 (-0.017 - -0.001)   | 0.03    |            |
| Sul       | Ciprofloxacin | CiproDDD         | -0.06 (-0.26 - 0.14)       | 0.55    | <0.0001    |
|           | Cotrimoxazole | CotrimDDD        | 0.56 (-0.56 - 1.68)        | 0.33    |            |
|           |               | Creatinin        | 0.4 (0.27 - 0.53)          | <0.001  |            |
| Tet       | Ciprofloxacin | CiproDDD         | -0.13 (-0.42 - 0.17)       | 0.4     | <0.0001    |
|           |               | Bilirubin        | 7.12 (1.75 - 12.48)        | 0.009   |            |
|           | Cotrimoxazole | CotrimDDD        | 2.34 (0.45 - 4.23)         | 0.015   |            |
| Tmt       |               | VirosDDD         | 29.36 (28.92 - 29.81)      | <0.001  | 0.94       |
|           |               | AFDDD            | -0.34 (-0.62 - -0.05)      | 0.02    |            |
|           | Ciprofloxacin | CiproDDD         | 4.57 (-0.83 - 9.97)        | 0.1     |            |
| Tmt       | Cotrimoxazole | CotrimDDD        | -59.58 (-106.15 - -13.02)  | 0.01    | <0.0001    |
|           |               | CotrimDDD        | -2.52 (-28.33 - 23.29)     | 0.85    |            |
|           |               | Creatinin        | -13.61 (-22.06 - -5.16)    | 0.002   |            |
| Tmt       | Ciprofloxacin | CiproDDD         | -0.004 (-0.039 - 0.03)     | 0.78    | <0.0001    |
|           | Cotrimoxazole | CotrimDDD        | 0.86 (-0.17 - 1.89)        | 0.1     |            |
|           |               | PPI              | 0.89 (0.08 - 1.71)         | 0.03    |            |
|           |               | AFDDD            | -0.17 (-0.32 - -0.02)      | 0.03    |            |

ARG, antibiotic resistance gene; 95% CI, 95% confidence interval; LR, likelihood ratio test for coefficient differences; AGly, aminoglycoside ARGs; Bla, beta-lactamases; CTX-M, plasmid-mediated cefotaximases; Flq, fluoroquinolone ARGs; Gly, glycopeptides ARGs; MLS, macrolide-lincosamide-streptogramin ARGs; Ntmdz, nitroimidazole ARG *nimB*; Phe, phenicol ARGs; Sul, Sulfonamide ARGs; Tet, Tetracyclines ARGs; Tmt, Trimethoprim ARGs; CiproDDD, cumulative dose of ciprofloxacin in defined daily doses (DDD); CotrimDDD, cumulative dose of cotrimoxazol in defined daily doses (DDD); VirosDDD, cumulative dose of antiviral agents in defined daily doses (DDD); Leucaemia, leucaemia as underlying disease; Viros, at least one administration of antiviral agents during the observation period; Lymphoma, lymphoma as underlying disease; AFDDD, cumulative dose of antifungals in defined daily doses (DDD); PPI, at least one administration of proton-pump inhibitors during the observation period.

The coefficients denote the increase (positive coefficient) or decrease (negative coefficient) of the respective antibiotic resistance gene class in length corrected relative abundance (LCRA) per unit of the model component. For instance, a coefficient of 1.45 for CotrimDDD within the ARG class AGly (aminoglycosides) means an increase of 1.45 length-corrected relative abundance units of AGly-ARGs per cumulative DDD increase of cotrimoxazole. The p-value denotes the statistical significance of the regression coefficient in a multivariate model, thus corrected for relevant cofactors. Contributing factors are displayed when statistical significant in the multivariate model ( $p \leq 0.05$ ). The LR p-value indicates differences between the antibiotics' coefficients. A Bonferroni corrected LR p-value  $< 0.002$  was regarded a significant difference in the impact of both antibiotics on a specific ARG class. The multivariate coefficient can be identical with the univariate coefficient for antibiotics when no confounding was noted.
