# Supplementary material for: Distinct impact of antibiotics on the gut microbiome and resistome: a longitudinal multicenter cohort study
Source: PubMed Central journal article supplement (PMC6749691; doi:10.1186/s12915-019-0692-y), 2019-09-18
Supplement: 12915_2019_692_MOESM17_ESM.pdf [file 12915_2019_692_MOESM17_ESM.pdf]

**Table S8. Kendall's rank correlation between gut microbiome species and gut resistome**

| Taxon                                 | ARG class | tau correlation coefficient | p-value |
|---------------------------------------|-----------|-----------------------------|---------|
| <i>Cotrimoxazole cohort</i>           |           |                             |         |
| <i>Klebsiella variicola</i>           | Tmt       | 0.29                        | 0.0003  |
| <i>Klebsiella variicola</i>           | Sul       | 0.27                        | 0.0006  |
| <i>Klebsiella aerogenes</i>           | Tmt       | 0.28                        | 0.0004  |
| <i>Klebsiella aerogenes</i>           | Sul       | 0.24                        | 0.0022  |
| <i>Klebsiella oxytoca</i>             | Sul       | 0.18                        | 0.02    |
| <i>Citrobacter youngae</i>            | Sul       | 0.31                        | 0.0001  |
| <i>Citrobacter youngae</i>            | Tmt       | 0.28                        | 0.0006  |
| <i>Citrobacter pasteurii</i>          | Tmt       | 0.3                         | 0.0007  |
| <i>Citrobacter europaeus</i>          | Sul       | 0.25                        | 0.0038  |
| <i>Citrobacter farmerii</i>           | Tmt       | 0.24                        | 0.005   |
| <i>Citrobacter farmerii</i>           | Sul       | 0.21                        | 0.01    |
| <i>Citrobacter freundii</i>           | Tmt       | 0.2                         | 0.012   |
| <i>Citrobacter werkmanii</i>          | Tmt       | 0.2                         | 0.016   |
| <i>Serratia marcescens</i>            | Sul       | 0.19                        | 0.017   |
| <i>Enterobacter asburiae</i>          | Sul       | 0.31                        | 0.0001  |
| <i>Enterobacter asburiae</i>          | Tmt       | 0.26                        | 0.0016  |
| <i>Enterobacter cloacae</i>           | Tmt       | 0.26                        | 0.0012  |
| <i>Enterobacter cloacae</i>           | Sul       | 0.24                        | 0.01    |
| <i>Ciprofloxacin cohort</i>           |           |                             |         |
| <i>Escherichia coli</i>               | Flq       | 0.22                        | 0.013   |
| <i>Citrobacter amalonaticus</i>       | Flq       | 0.35                        | 0.0001  |
| <i>Citrobacter youngae</i>            | Flq       | 0.32                        | 0.0003  |
| <i>Citrobacter farmerii</i>           | Flq       | 0.33                        | 0.0006  |
| <i>Enterobacter cloacae</i>           | Flq       | 0.35                        | 0.0007  |
| <i>Serratia marcescens</i>            | Flq       | 0.36                        | 0.00004 |
| <i>Staphylococcus aureus</i>          | Flq       | 0.36                        | 0.00005 |
| <i>Staphylococcus saccharolyticus</i> | Flq       | 0.29                        | 0.0017  |

ARG, antibiotic resistance gene; Flq, fluoroquinolone ARGs; Sul, sulfonamide ARGs; Tmt, Trimethoprim ARGs.

A positive coefficient indicates a parallel increase or decrease of taxa and resistance genes. For instance, *Klebsiella variicola* relative abundance increases with the length corrected relative abundance of trimethoprim resistances genes (tau = 0.29, p = 0.003). Since we observed a strong increase of trimethoprim resistances genes under cotrimoxazole treatment, a parallel increase of *Klebsiella variicola* can be suggested. Another interesting example is *Staphylococcus saccharolyticus* which is positively correlated with fluoroquinolone ARGs. We observed a high number of novel detections of this species under ciprofloxacin treatment (Figure 1E), suggesting a link between the antibiotic treatment and relative species abundance.
