# Supplementary material for: Distinct impact of antibiotics on the gut microbiome and resistome: a longitudinal multicenter cohort study
Source: PubMed Central journal article supplement (PMC6749691; doi:10.1186/s12915-019-0692-y), 2019-09-18
Supplement: 12915_2019_692_MOESM20_ESM.pdf [file 12915_2019_692_MOESM20_ESM.pdf]

**Table S10. Multivariate models of selection pressure estimates on the intestinal plasmidome**

| Plasmidome variable                | Drug model    | Model components | Coefficient (95% CI)     | p-value                 | LR p-value |
|------------------------------------|---------------|------------------|--------------------------|-------------------------|------------|
| Plasmid Shannon diversity          | Ciprofloxacin | CiproDDD         | -0.23 (-0.29 - -0.17)    | <0.001                  | 1          |
|                                    |               | Creatinin        | 0.93 (0.15 - 1.72)       | 0.02                    |            |
|                                    | Cotrimoxazole | CotrimDDD        | -0.25 (-0.53 - 0.03)     | 0.08                    |            |
|                                    |               | Lymphoma         | -1.13 (-1.45 - -0.81)    | <0.001                  |            |
|                                    |               | VirosDDD         | -0.51 (-0.64 - -0.37)    | <0.001                  |            |
| Plasmid evenness                   | Ciprofloxacin | CiproDDD         | 0.001 (-0.002 - 0.005)   | 0.46                    | <0.0001    |
|                                    |               | Cotrimoxazole    | CotrimDDD                | -0.003 (-0.007 - 0.001) |            |
|                                    |               | Lymphoma         | -0.01 (-0.02 - -0.004)   | 0.001                   |            |
|                                    |               | Viros            | -0.005 (-0.009 - -0.001) | 0.014                   |            |
| Plasmid abundance                  | Ciprofloxacin | CiproDDD         | -36.18 (-57.14 - -15.21) | 0.002                   | 0.02       |
|                                    |               | Viros            | 58.53 (11.36 - 105.7)    | 0.02                    |            |
|                                    | Cotrimoxazole | CotrimDDD        | -45.65 (-123.64 - 32.33) | 0.24                    |            |
|                                    |               | VirosDDD         | -67.06 (-98.7 - -35.43)  | <0.001                  |            |
| Plasmid abundance (Proteobacteria) | Ciprofloxacin | CiproDDD         | -9.9 (-16.17 - -3.63)    | 0.002                   | 0.02       |
|                                    |               | Cotrimoxazole    | CotrimDDD                | 2.12 (-21.95 - 26.21)   |            |
|                                    |               | AF               | 31.64 (2.65 - 60.63)     | 0.03                    |            |
|                                    |               | VirosDDD         | -24.55 (-34.31 - -14.78) | <0.001                  |            |

95% CI, 95% confidence interval; LR, likelihood ratio test for coefficient differences; CiproDDD, cumulative dose of ciprofloxacin in defined daily doses (DDD); CotrimDDD, cumulative dose of cotrimoxazole in defined daily doses (DDD); VirosDDD, cumulative dose of antiviral agents in defined daily doses (DDD); Lymphoma, lymphoma as underlying disease; AF, at least one administration of antifungals during the observation period; Viros, at least one administration of antiviral agents during the observation period; Platelets, platelet count.

The coefficients denote the increase (positive coefficient) or decrease (negative coefficient) of the plasmid diversity/evenness/abundance per unit of the model component. For instance, a coefficient of -0.23 for CiproDDD regarding plasmid diversity means a decrease of 0.23 units Shannon diversity per cumulative DDD increase of ciprofloxacin. The p-value denotes the statistical significance of the regression coefficient in a multivariate model, thus corrected for relevant cofactors. Contributing factors are displayed when statistically significant in the multivariate model ( $p \leq 0.05$ ). The LR p-value indicates differences between the antibiotics' coefficients. A Bonferroni corrected LR p-value  $< 0.002$  was regarded a significant difference in the impact of both antibiotics on a specific plasmidome variable. Plasmid abundance is expressed as normalized plasmid coverage. The multivariate coefficient can be identical with the univariate coefficient for antibiotics when no confounding was noted.
