# Supplementary material for: Distinct impact of antibiotics on the gut microbiome and resistome: a longitudinal multicenter cohort study
Source: PubMed Central journal article supplement (PMC6749691; doi:10.1186/s12915-019-0692-y), 2019-09-18
Supplement: 12915_2019_692_MOESM23_ESM.pdf [file 12915_2019_692_MOESM23_ESM.pdf]

**Table S13. List of concomitant drugs in both study cohorts**

| Ciprofloxacin cohort                                                                                                                                                                                                                                                                                                                                                                             | Cotrimoxazole cohort                                                                                                                                                                                                                                                                                                                              |
|--------------------------------------------------------------------------------------------------------------------------------------------------------------------------------------------------------------------------------------------------------------------------------------------------------------------------------------------------------------------------------------------------|---------------------------------------------------------------------------------------------------------------------------------------------------------------------------------------------------------------------------------------------------------------------------------------------------------------------------------------------------|
| <i>Virostatic agents</i>                                                                                                                                                                                                                                                                                                                                                                         |                                                                                                                                                                                                                                                                                                                                                   |
| <ul style="list-style-type: none"> <li>• acyclovir</li> <li>• ribavirin</li> </ul>                                                                                                                                                                                                                                                                                                               | <ul style="list-style-type: none"> <li>• valaciclovir</li> </ul>                                                                                                                                                                                                                                                                                  |
| <i>Antifungals</i>                                                                                                                                                                                                                                                                                                                                                                               |                                                                                                                                                                                                                                                                                                                                                   |
| <ul style="list-style-type: none"> <li>• posaconazole</li> <li>• amphotericin B</li> <li>• pentamidine</li> <li>• fluconazole</li> </ul>                                                                                                                                                                                                                                                         | <ul style="list-style-type: none"> <li>• posaconazole</li> <li>• amphotericin B</li> </ul>                                                                                                                                                                                                                                                        |
| <i>Proton pump inhibitors</i>                                                                                                                                                                                                                                                                                                                                                                    |                                                                                                                                                                                                                                                                                                                                                   |
| <ul style="list-style-type: none"> <li>• pantoprazole</li> </ul>                                                                                                                                                                                                                                                                                                                                 | <ul style="list-style-type: none"> <li>• pantoprazole</li> </ul>                                                                                                                                                                                                                                                                                  |
| <i>Anti-cancer substances</i>                                                                                                                                                                                                                                                                                                                                                                    |                                                                                                                                                                                                                                                                                                                                                   |
| <ul style="list-style-type: none"> <li>• cytarabine</li> <li>• rituximab</li> <li>• cyclophosphamide</li> <li>• etoposide</li> <li>• vincristine</li> <li>• doxorubicin</li> <li>• bortezomib</li> <li>• cisplatin</li> <li>• imatinib</li> <li>• hydroxyurea</li> <li>• idarubicin</li> <li>• lenalidomide</li> <li>• daunorubicin</li> <li>• decitabine</li> <li>• arsenic trioxide</li> </ul> | <ul style="list-style-type: none"> <li>• cytarabine</li> <li>• rituximab</li> <li>• cyclophosphamide</li> <li>• etoposide</li> <li>• vincristine</li> <li>• doxorubicin</li> <li>• bortezomib</li> <li>• procarbazine</li> <li>• mitoxantrone</li> <li>• bleomycin</li> <li>• ifosfamide</li> <li>• elotuzumab</li> <li>• methotrexate</li> </ul> |
| <i>Laxatives</i>                                                                                                                                                                                                                                                                                                                                                                                 |                                                                                                                                                                                                                                                                                                                                                   |
| <ul style="list-style-type: none"> <li>• lactulose</li> <li>• polyethylene glycol (macrogol)</li> <li>• sodium picosulfate</li> </ul>                                                                                                                                                                                                                                                            | <ul style="list-style-type: none"> <li>• lactulose</li> <li>• polyethylene glycol (macrogol)</li> <li>• sodium picosulfate</li> </ul>                                                                                                                                                                                                             |
| <i>Cholesterol-lowering substances</i>                                                                                                                                                                                                                                                                                                                                                           |                                                                                                                                                                                                                                                                                                                                                   |
| <ul style="list-style-type: none"> <li>• simvastatin</li> </ul>                                                                                                                                                                                                                                                                                                                                  |                                                                                                                                                                                                                                                                                                                                                   |
| <i>Immunosuppressives</i>                                                                                                                                                                                                                                                                                                                                                                        |                                                                                                                                                                                                                                                                                                                                                   |
| <ul style="list-style-type: none"> <li>• dexamethasone</li> <li>• prednisolone</li> </ul>                                                                                                                                                                                                                                                                                                        | <ul style="list-style-type: none"> <li>• dexamethasone</li> <li>• prednisone</li> </ul>                                                                                                                                                                                                                                                           |
| <i>Others</i>                                                                                                                                                                                                                                                                                                                                                                                    |                                                                                                                                                                                                                                                                                                                                                   |
| <ul style="list-style-type: none"> <li>• ranitidine</li> <li>• retinoic acid</li> </ul>                                                                                                                                                                                                                                                                                                          | <ul style="list-style-type: none"> <li>• ranitidine</li> </ul>                                                                                                                                                                                                                                                                                    |
